# Supplementary material for: Structure and Properties of Reactively Extruded Opaque Post-Consumer Recycled PET
Source: MDPI journal article supplement (doi:10.3390/polym13203531), 2021-10-14
Supplement: s1 [file s1]

Supplementary material

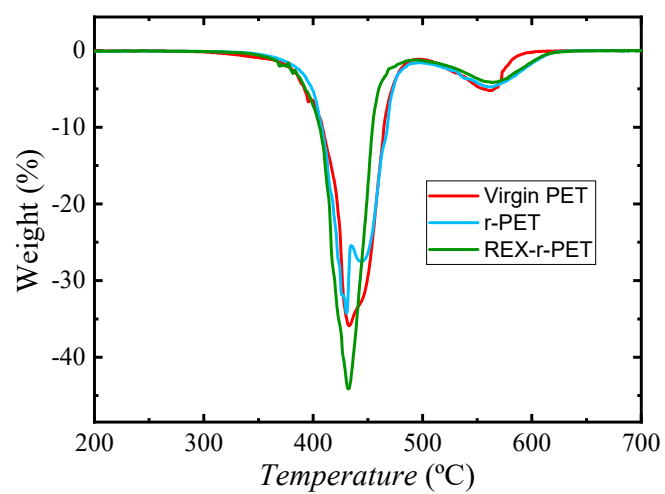

Figure S1. DTGA.

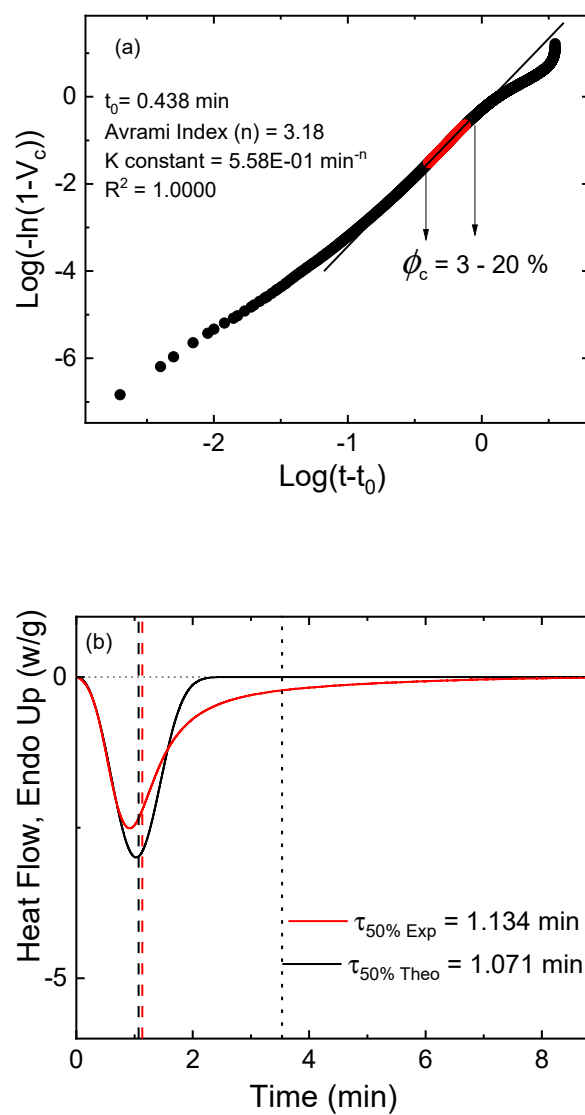

**Figure S2.** An example of Avrami plots of the data obtained during crystallization of r-PET-O at 200 °C. (a) Avrami plot of the experimental data obtained during crystallization. (b) Normalized heat flow experimental data during crystallization compared to the data predicted data by the Avrami model.

**Table S1.** Parameters obtained from fitting the DSC data presented in Figure SI-1 to the Avrami model.

| $T_c$ | $t_0$ | $n$  | $K$                  | $K_{1/n}$ | $R$ | $t_{50\% \text{ exp}}$ | $t_{0\% \text{ Theo}}$ | $1/t_{50\% \text{ exp}}$ |
|-------|-------|------|----------------------|-----------|-----|------------------------|------------------------|--------------------------|
| (°C)  | (min) |      | (min <sup>-n</sup> ) |           |     | (min)                  | (min)                  | (1/min)                  |
| 200   | 0.345 | 2.89 | 0.853                | 0.6316    | 1   | 0.931                  | 0.957                  | 1.07411                  |
